# Supplementary material
Source: PubMed Central journal article supplement (PMC3391542)
Supplement: NIHMS383526-supplement-1_si_001.pdf [file NIHMS383526-supplement-1_si_001.pdf]

## Supporting Information

### The Thole Linear (TL) and Thole-Amoeba-like (TA) Dipole Interaction Models

For a collection of  $N$  point polarizable dipoles placed in a homogeneous electric field  $E$ , the induced dipole moment at point  $p$  ( $\mu_p$ ) is calculated by Eq. 1, where  $\alpha_p$  is the atomic polarizability and  $T_{pq}$  is the dipole field tensor which is calculated with Eq. 2.

$$\mu_p = \alpha_p [E_p - \sum_{q \neq p}^N T_{pq} \mu_q] \quad (1)$$

$$T_{pq} = \frac{f_e}{r_{pq}^3} \mathbf{I} - \frac{3f_t}{r_{pq}^5} \begin{bmatrix} x^2 & xy & xz \\ yx & y^2 & yz \\ zx & zy & z^2 \end{bmatrix} \quad (2)$$

Where  $\mathbf{I}$  is a unit matrix and  $f_e$  and  $f_t$  are the distance-dependent screening functions introduced by Thole to avoid the ‘‘polarization catastrophe’’ when two inducible dipoles approach to each other.<sup>1,2</sup>

For the TL model,  $f_e$  and  $f_t$  take a linear functional form:

$$\begin{aligned} v &= r_{pq} / [k(\alpha_p \alpha_q)^{1/6}] \\ \text{if } (v \geq 1) f_e &= 1.0, f_t = 1.0 \\ \text{if } (v < 1) f_e &= 4v^3 - 3v^4, f_t = v^4 \end{aligned} \quad (3)$$

In the TA model,  $f_e$  and  $f_t$  take an exponential form:

$$\begin{aligned} v &= r_{pq} / [k(\alpha_p \alpha_q)^{1/6}] \\ f_e &= 1 - \exp(-v^3) \\ f_t &= 1 - (v^3 + 1) \exp(-v^3) \end{aligned} \quad (4)$$

Where  $\alpha_p$ ,  $\alpha_q$  are the atomic polarizabilities of atoms  $p$  and  $q$ , respectively;  $k$  is the screening factor, and  $r_{pq}$  is the distance between atoms  $p$  and  $q$ . The TA model is used in Amoeba force field.<sup>3,4</sup> Please note that the formula in Eq. 4 differs from those in Thole and Ren and Ponder’s works. In our case we obtained  $k = 1.6209$  for the TA model by fitting to the high-level QM data in our earlier work.<sup>5</sup> This is equivalent to 0.2348 when the formula is converted to those in Thole and Ren and Ponder’s works and is smaller than 0.572 in Thole’s work and 0.39

in Ren and Ponder's work, respectively. For TL model, our screening factor  $k = 2.5874$ , larger than 1.662 obtained by Thole.

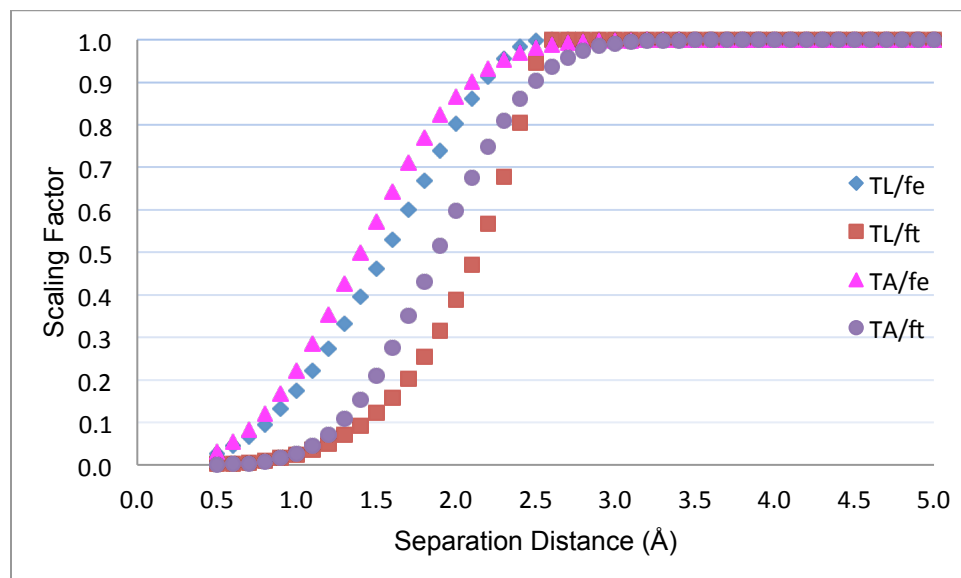

Figure S1. Screening effect of two Thole polarizable models for atomic pairs  $C_{sp^3}-C_{sp^3}$  as a function of separation distance. The screening functions,  $f_e$  and  $f_t$  for the two polarizability models (TL and TA) are defined in the supporting material. When two atoms approach to each other, to avoid “polarization catastrophe” the dipole interaction between two is scaled down. The smaller the scaling factor, the larger the screening effect is. It is demonstrated that when the separation distance is smaller than 2.5 Å, TL model has larger screening effect than the TA model.

## References

- (1) Thole, B. T. *Chemical Physics* **1981**, *59*, 341.
- (2) van Duijnen, P. T.; Swart, M. *The Journal of Physical Chemistry A* **1998**, *102*, 2399.
- (3) Ponder, J. W.; Case, D. A. *Adv. Protein Chem.* **2003**, *66*, 27.
- (4) Ren, P.; Ponder, J. W. *J Comput Chem* **2002**, *23*, 1497.
- (5) Wang, J. M.; Cieplak, P.; Li, J.; Hou, T. J.; Luo, R.; Duan, Y. *Journal of Physical Chemistry B* **2011**, *115*, 3091.
